# Supplementary material for: Fly ash supported Pd–Ag bimetallic nanoparticles exhibiting a synergistic catalytic effect for the reduction of nitrophenol
Source: Royal Society of Chemistry journal article supplement (doi:10.1039/d0dt01899f), 2020-01-01
Supplement: d0dt01899f1.pdf [file d0dt01899f1.pdf]

## Supplementary Information

### Fly Ash Supported Pd-Ag Bimetallic Nanoparticles Exhibiting Synergistic Catalytic Effect for the Reduction of Nitrophenol

Niladri Maity,<sup>\*a</sup> Anupam Sahoo,<sup>b</sup> Rajkumar Boddhula,<sup>c</sup> Saurav Chatterjee,<sup>c</sup> Srikanta Patra<sup>b</sup> and Binod Bihari Panda<sup>a</sup>

<sup>a</sup>Department of Chemistry, Indira Gandhi Institute of Technology, Sarang, Dhenkanal, Odisha-759146, India.

<sup>b</sup>School of Basic Sciences, Indian Institute of Technology Bhubaneswar, Bhubaneswar, Orissa 751007, India.

<sup>c</sup>Department of Chemistry, National Institute of Technology Rourkela, Rourkela, Orissa 769008, India.

#### Table of contents

|                                                                      |       |
|----------------------------------------------------------------------|-------|
| 1. ICP-AES data for fly ash supported metal nanoparticles.....       | S2    |
| 2. SEM image and EDX spectrum of fly ash.....                        | S2    |
| 3. EDX data for fly ash.....                                         | S2    |
| 4. FE-SEM images and elemental mapping for FA-Pd and FA-Ag.....      | S3    |
| 5. Pd-Ag nanoparticles size distribution in FA-Pd-Ag.....            | S3    |
| 6. TEM images for FA-Pd and FA-Ag.....                               | S4    |
| 7. Pd and Ag nanoparticles size distribution in FA-Pd and FA-Ag..... | S5    |
| 8. XPS survey spectrum.....                                          | S6    |
| 9. Uv-Vis spectra of reference compounds.....                        | S6    |
| 10. Kinetic studies for the reaction of 4-nitrophen.....             | S7-S8 |

**1. ICP-AES analysis data for fly ash supported metal nanoparticles**

**Table S1.**

| Compound | Atomic Wt. (%) |      |
|----------|----------------|------|
|          | Pd             | Ag   |
| FA-Pd-Ag | 0.51           | 0.24 |
| FA-Pd    | 0.93           | 0    |
| FA-Ag    | 0              | 0.14 |

**2. SEM image and EDX spectrum of fly ash**

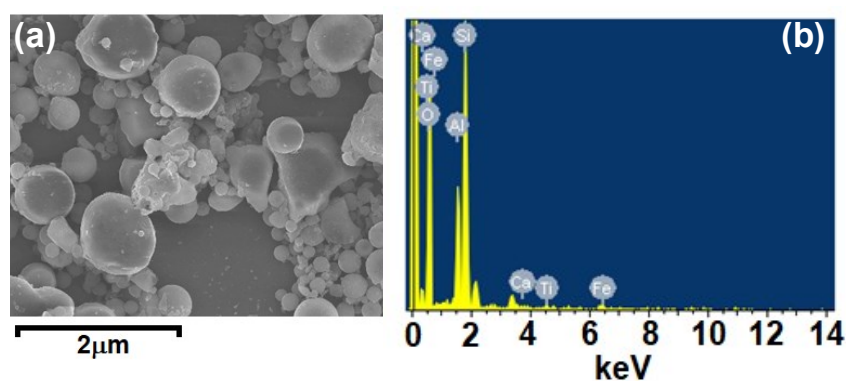

**Fig. S1** (a) SEM image and (b) EDX spectrum of fly ash.

**3. EDX data of fly ash**

**Table S2.**

| Compound     | Atomic Wt. (%) |       |      |           |           |           |
|--------------|----------------|-------|------|-----------|-----------|-----------|
|              | O              | Si    | Al   | Ca        | Ti        | Fe        |
| Fly ash (FA) | 73-80          | 13-16 | 6-12 | 0.01-0.14 | 0.05-0.22 | 0.17-0.42 |

#### 4. FE-SEM images and elemental mapping for FA-Pd and FA-Ag

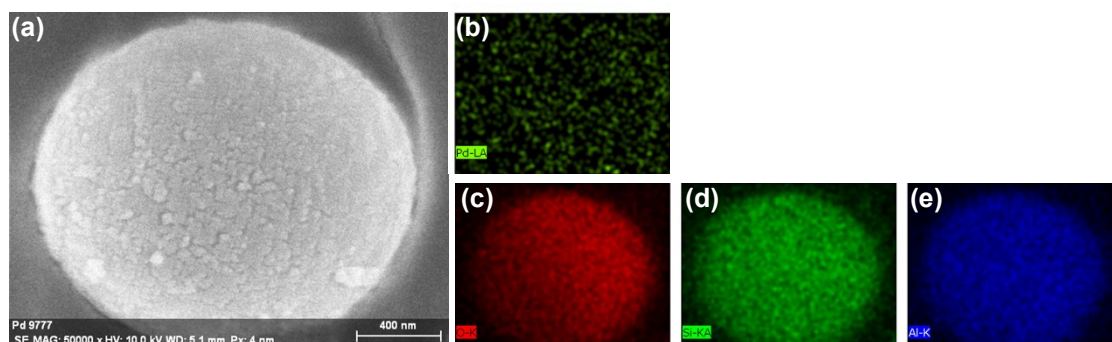

**Fig. S2** (a) FE-SEM image of FA-Pd. Elemental mapping showing the distribution of (b) Pd nanoparticles along with (c) O, (d) Si and (e) Al atoms on the surface of FA-Pd.

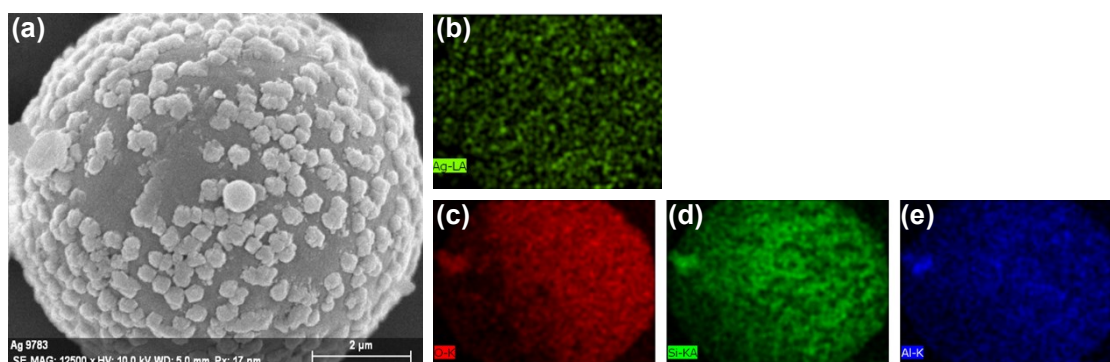

**Fig. S3** (a) FE-SEM image of FA-Ag. Elemental mapping showing the distribution of (b) Ag nanoparticles along with (c) O, (d) Si and (e) Al atoms on the surface of FA-Ag.

#### 5. Pd-Ag nanoparticles size distribution in FA-Pd-Ag

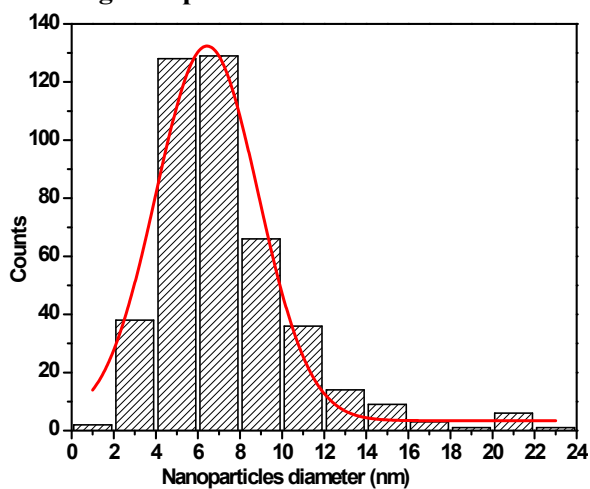

**Fig. S4** Size distribution histogram of Pd-Ag nanoparticles in FA-Pd-Ag.

## 6. TEM images for FA-Pd and FA-Ag

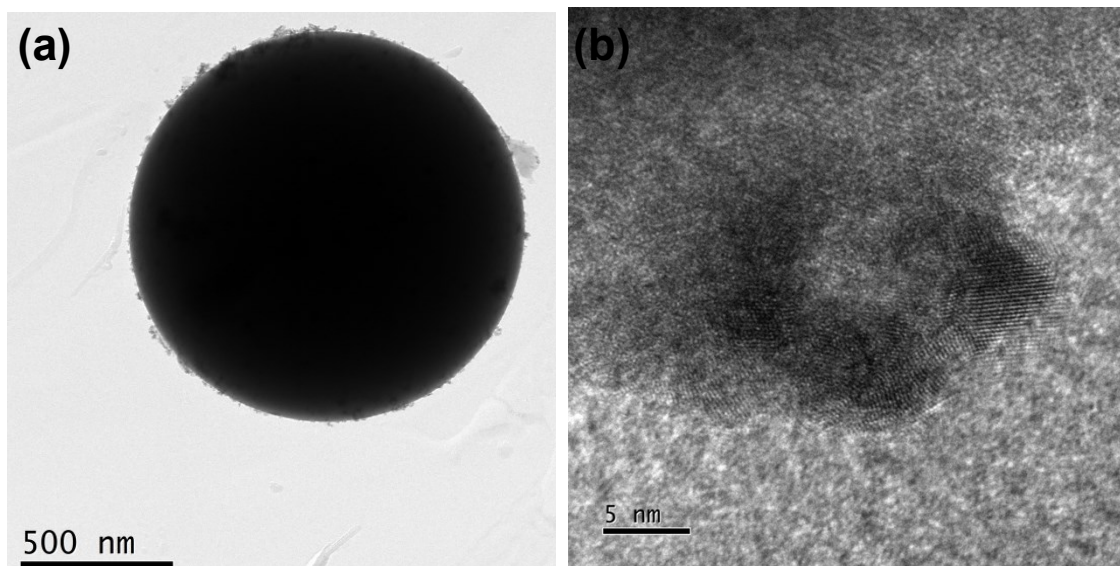

**Fig. S5** TEM image of (a) FA-Pd and (b) its expanded (HRTEM) view showing the lattice spacing of Pd nanoparticles.

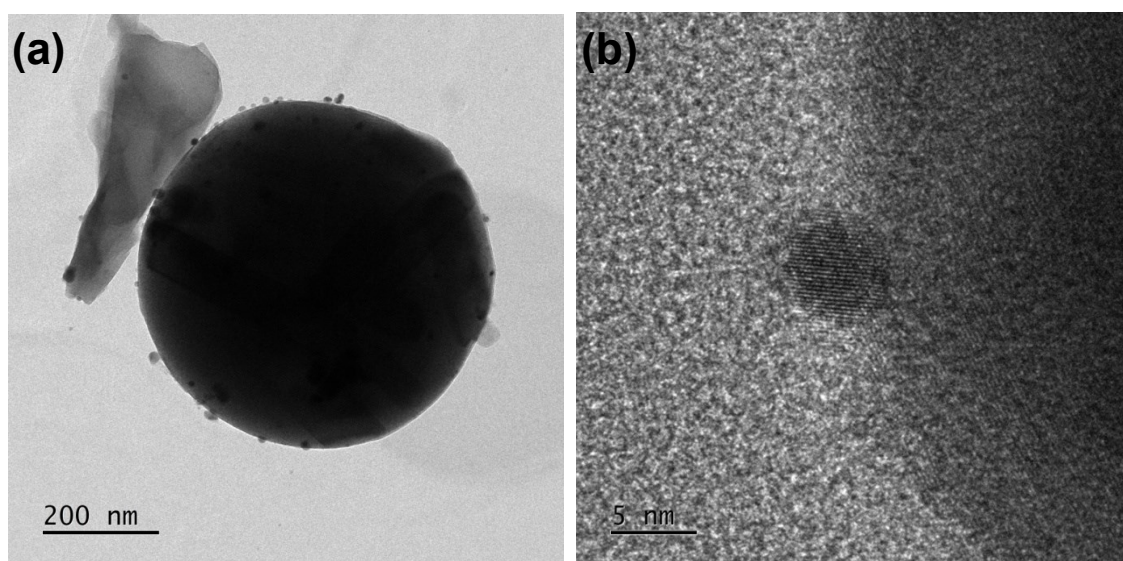

**Fig. S6** TEM image of (a) FA-Ag and (b) its expanded (HRTEM) view showing the lattice spacing of Ag nanoparticles.

## 7. Pd and Ag nanoparticles size distribution in FA-Pd and FA-Ag

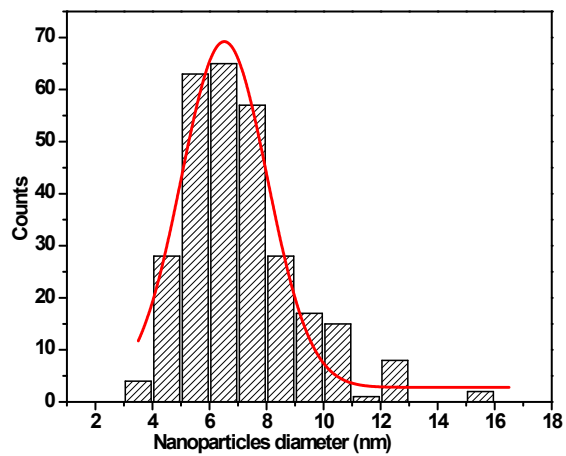

Fig. S7 Size distribution histogram of Pd nanoparticles in FA-Pd.

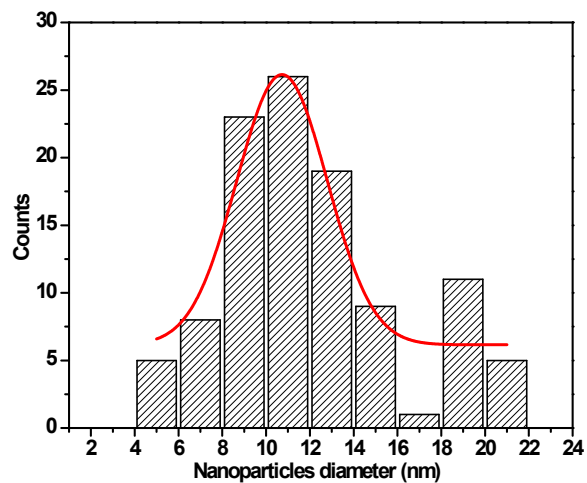

Fig. S8 Size distribution histogram of Ag nanoparticles in FA-Ag.

## 8. XPS survey spectrum

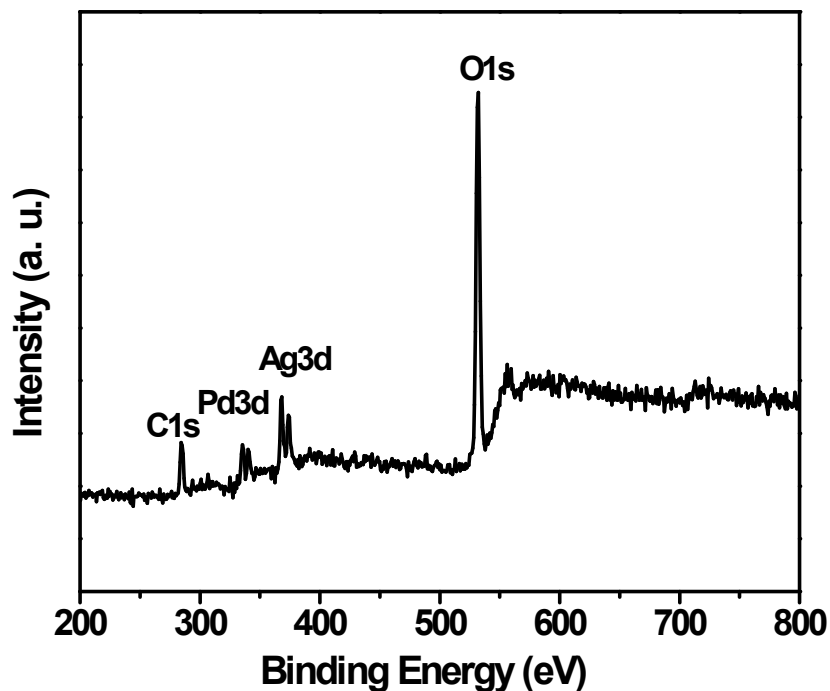

Fig. S9 XPS survey spectrum for FA-Pd-Ag.

## 9. UV-Vis spectra of reference compounds

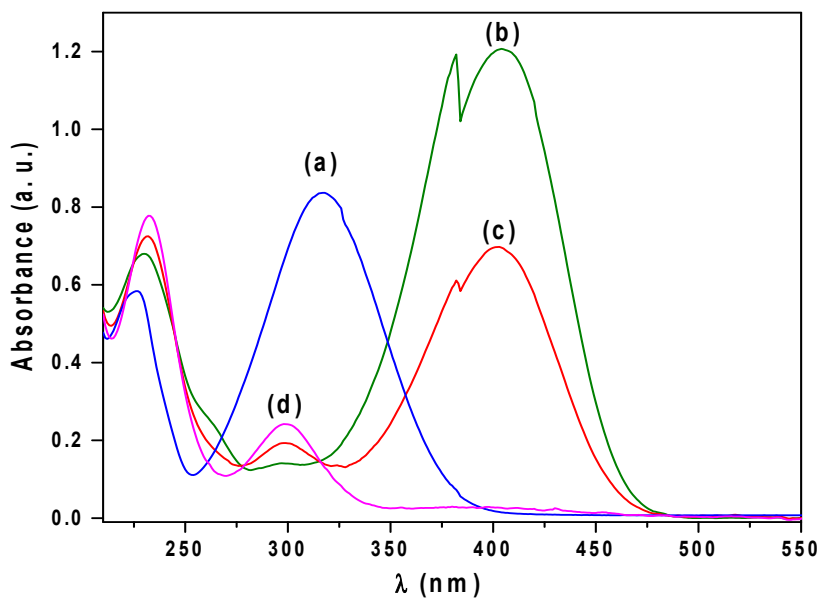

Fig. S10 UV-Vis Absorption spectra recorded for (a) 4-nitrophenol, (b) 4-nitrophenolate ion formed after the addition of  $\text{NaBH}_4$  into 4-nitrophenol solution, (c) 1 minute after the addition of CFA-Pd-Ag catalyst into the mixture of  $\text{NaBH}_4$  and 4-nitrophenol and (d) 4-aminophenolate ion.

**10. Kinetic studies for the reaction of 4-nitrophenol by FA-Pd, FA-Ag, (FA-Pd+FA-Ag) and FA**

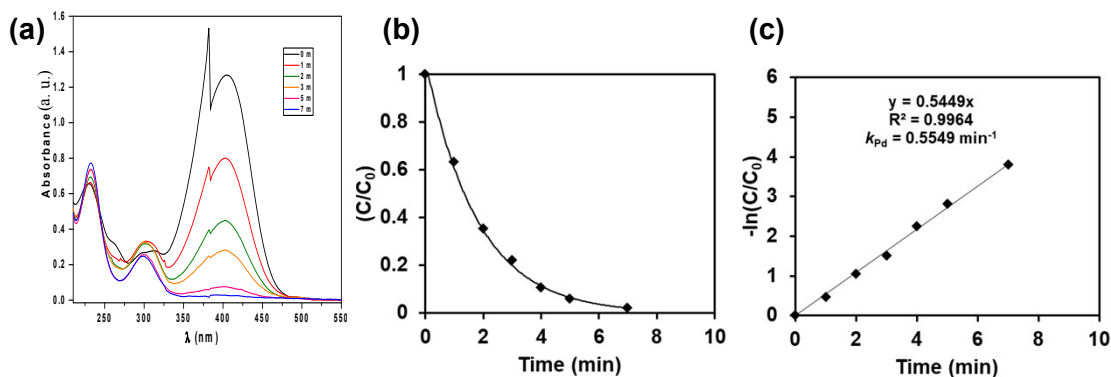

**Fig. S11** (a) Time-resolved UV-vis absorption spectra, (b)  $(C/C_0)$  vs time and (c)  $-\ln(C/C_0)$  vs time plots for the reduction of 4-nitrophenol utilizing FA-Pd.

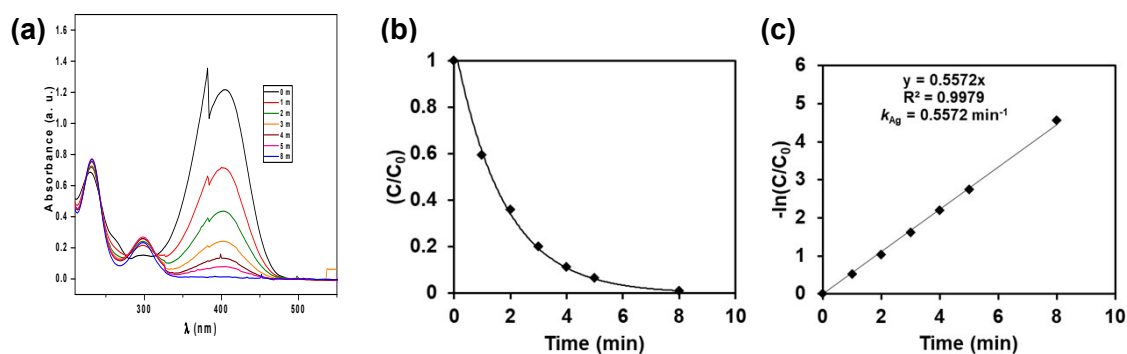

**Fig. S12** (a) Time-resolved UV-vis absorption spectra, (b)  $(C/C_0)$  vs time and (c)  $-\ln(C/C_0)$  vs time plots for the reduction of 4-nitrophenol utilizing FA-Ag.

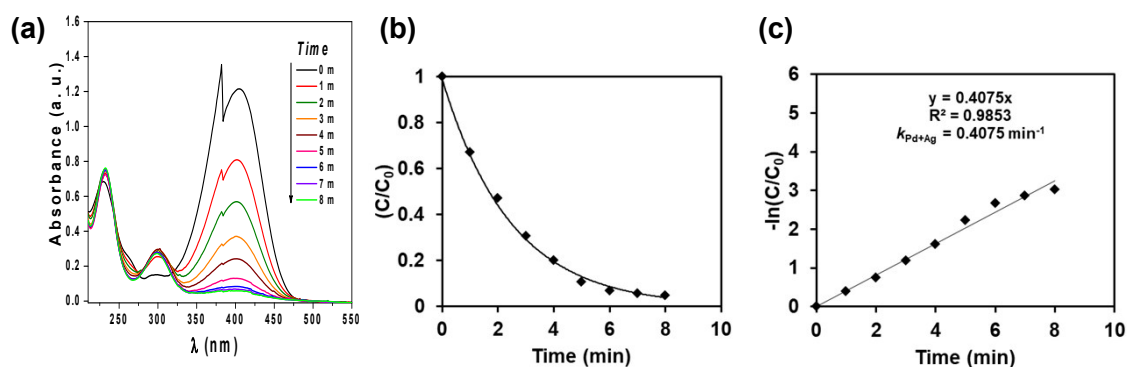

**Fig. S13** (a) Time-resolved UV-vis absorption spectra, (b)  $(C/C_0)$  vs time and (c)  $-\ln(C/C_0)$  vs time plots for the reduction of 4-nitrophenol utilizing (FA-Pd +FA-Ag).

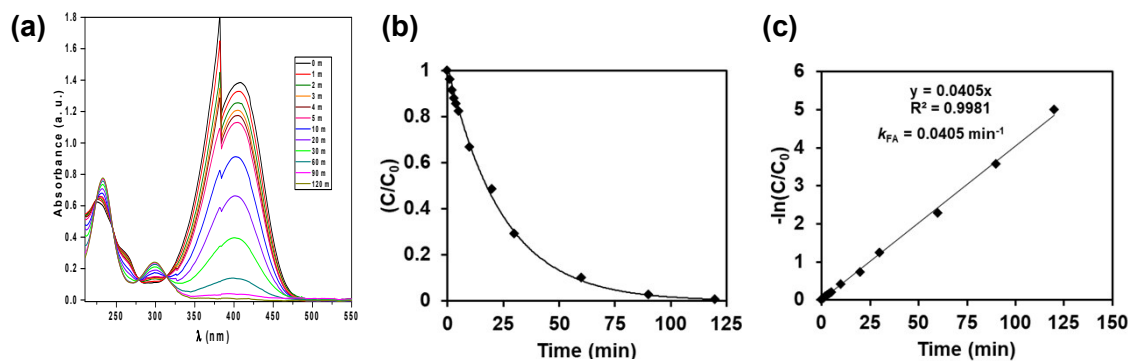

**Fig. S14.** (a) Time-resolved UV–vis absorption spectra, (b)  $(C/C_0)$  vs time and (c)  $-\ln(C/C_0)$  vs time plots for the reduction of 4-nitrophenol utilizing FA.
